# Supplementary material for: Procaine Attenuates Pain Behaviors of Neuropathic Pain Model Rats Possibly via Inhibiting JAK2/STAT3
Source: PubMed Central journal article supplement — Biomol Ther (Seoul). 2016 Sep 1;24(5):489–94. doi: 10.4062/biomolther.2016.006 (PMC5012873; doi:10.4062/biomolther.2016.006), 2016-09-01
Supplement: BT-24-489_suppl.pdf [file BT-24-489_suppl.pdf]

Summary of the changes:

1. Figure 2D and Figure 3E are added, and the corresponding description is added in the manuscript and legends.
2. The Results part is revised.
